# Supplementary material
Source: Springer Nature journal article supplement (https://www.springermedizin.de/resource/supplementary/12890_2013_483_MOESM1_ESM.pdf/9505586)

**< Additional Figure-1 >**

*Survival curves after diagnosis of MDS in each mild and severe MDS*

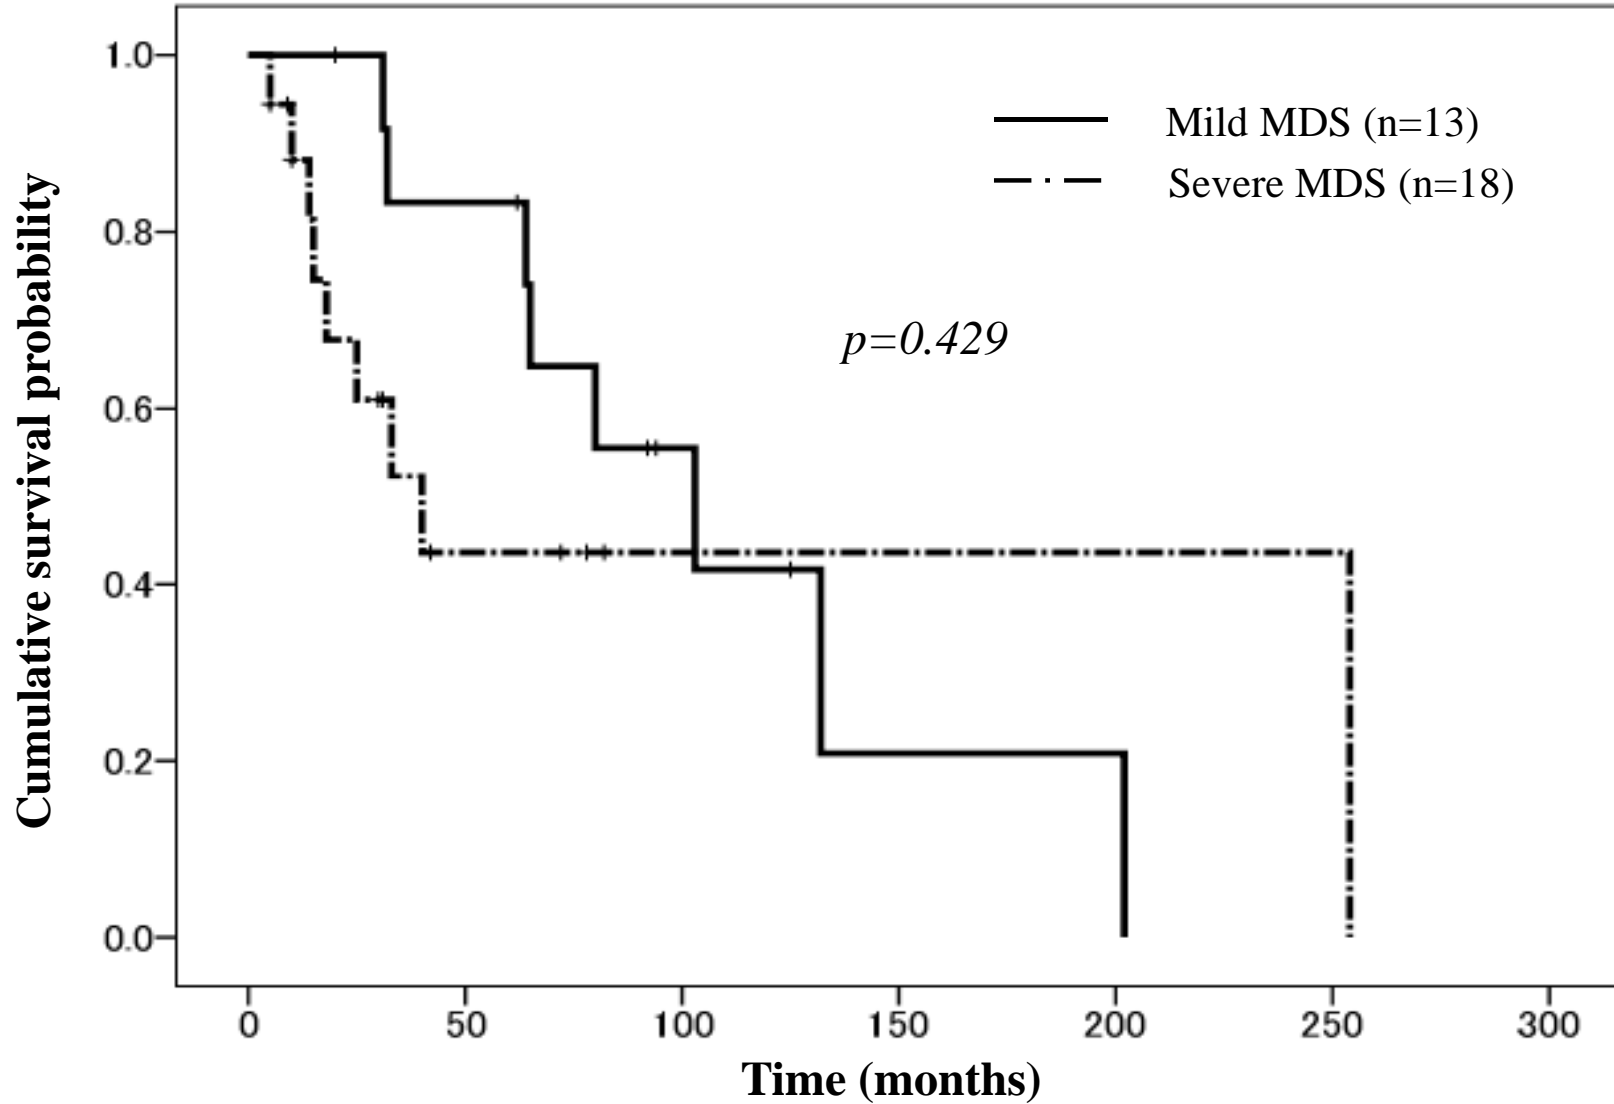

Supplement: MOESM1 [file 9505586]
